# Supplementary material
Source: Elsevier journal article supplement (https://www.sciencedirect.com/science/article/pii/S0034935620300529)
Supplement: mmc1 [file S0034935620300529:mmc1.docx]

**Material Suplementario**

**Tabla Suplementaria 1. Criterios de activación del EUM**

| **Criterios de activación del Equipo de Urgencias Médicas** | |
| --- | --- |
| Vía aérea | Amenaza de la vía aérea |
| Respiración | Parada respiratoria |
| Frecuencia respiratoria≤5 o ≥36 ciclos por minuto |
| Circulación | Frecuencia cardiaca ≤40 o ≥140 latidos por minuto |
| Presión arterial ≤90mmHg |
| Parada cardiaca |
| Neurológico | Cambio súbito del estatus mental |
| Descenso en la escala de coma Glasgow ≥2 puntos |
| Convulsiones repetidas |
| Otros | Cualquier situación que preocupe al interlocutor |

**Tabla Suplementaria 2. Encuesta aplicada traducida al español**

| *Introducción:* | |
| --- | --- |
| El objetivo de este cuestionario es identificar las áreas de mejora del Sistema de urgencias médicas (SUM) del Hospital Pedro Hispano (HPH).  A fin de cumplir este objetivo, es esencial saber la opinión de todos los empleados del Hospital.  El cuestionario es anónimo, y al firmarlo otorga Vd. su consentimiento para utilizar los datos relacionados en estudios científicos y/o publicaciones.  No le llevará más de 5 minutos el contestar. Gracias por su tiempo. | |
| *Sección 1. Información sobre su perfil:* | |
| **1.** | **Edad: ___** |
| **2.** | **Sexo**  Varón  Mujer |
| **3.** | **Puesto de trabajo**  Auxiliar administrativo  Médico  Auxiliar sanitario  Farmacéutico  Psicólogo  Enfermero  Dietista  Trabajador social  Técnico  Otros |
| **4.** | **Departamento**  Anestesiología  Ambulatorio  Técnicas diagnósticas y terapéuticas  Medicina de Urgencias y Cuidados Intensivos  Medicina  Salud mental  Cirugía  Mujeres, adolescentes y niños  No clínica |
| **5.** | **Formación**  Escuela secundaria  Escuela preparatoria  Licenciatura  Título de Máster  Título de Doctor |
| **6.** | **Años de trabajo en atención sanitaria: ___** |
| **7.** | **Años de trabajo en HPH: ___** |
| **8.** | **¿Es Vd. miembro del EUM?**  Sí  No |
| *Sección 2. Información sobre su experiencia en formación de Soporte vital básico (SVB):* | |
| **9.** | **¿Ha obtenido certificación SVB en HPH?**  Sí (pasar a la pregunta número 11)  No ( pasar a la pregunta número 10) |
| **10.** | **¿Cuáles son los motivos de no haber realizado el curso SVB?** (pasar a la pregunta 17 tras responder a la pregunta 10)  No he recibido nunca invitación/notificación No lo sé Soy instructor de SVB/SVA/SVI  He completado la formación en SVA/SVI en los últimos 5 años |
| **11.** | **¿Durante cuánto tiempo ha realizado formación en SVB en HPH? ____** |
| **12.** | **¿Considera de utilidad el curso SVB?**  Sí  No |
| **13.** | **¿Considera de utilidad la formación en simulación SVB?**  Sí  No |
| **14.** | **¿Considera de utilidad el taller relativo al SUM?**  Sí  No |
| **15.** | **¿Considera de utilidad el manual sobre SVB?**  Sí  No |
| **16.** | **Anote aquí sus sugerencias de mejora, o comentarios sobre la formación SVB en HPH.** |
| *Sección 3. Información sobre la activación del EUM:* | |
| **17.** | **¿Considera adecuados los criterios de activación?**  Sí  No  No conozco los criterios de activación |
| **18.** | **¿Conoce el número de teléfono para activar el EUM?**  Sí  No |
| **19.** | **Anote aquí sus sugerencias para mejorar los criterios de activación.** |
| *Sección 4. Información sobre la organización del SUM:* | |
| **20.** | **¿Considera adecuado el contenido de los carros de resucitación para situaciones de emergencia?**  Sí  No  No estoy familiarizado con el contenido de los carros de resucitación |
| **21.** | **¿Considera adecuado el equipo de desfibrilación para situaciones de emergencia?**  Sí  No  No estoy familiarizado con el equipo de desfibrilación |
| **22.** | **¿Considera adecuada la información disponible en la intranet del Hospital sobre el SUM?**  Sí  No  Nunca lo he leído, pero soy consciente de su existencia  No sabía que existía |
| **23.** | **¿Sabe cómo funciona el SUM de HPH?**  Sí  No |
| **24.** | **¿Sabe a quién dirigirse en caso de dudas acerca de la organización del SUM?**  Sí  No |
| **25.** | **Anote aquí sus sugerencias para mejorar la información sobre RRS, o el material de los carros de emergencia.** |
| **26.** | **¿Ha participado o asistido alguna vez a una activación del EUM?**  Sí (pase a la pregunta 27)  No ( pase a la pregunta 37) |
| *Sección 5. Información sobre el desempeño y comportamiento del EUM. Elíjase la mejor opción para cada afirmación (1 – totalmente en desacuerdo; 2 – en desacuerdo; 3 – ni de acuerdo ni en desacuerdo; 4 – de acuerdo; 5 – totalmente de acuerdo):* | |
| **27.** | El EUM es importante para el cuidado de los pacientes intrahospitalarios |
| **28.** | El EUM llega rápido al lugar de la activación |
| **29.** | El EUM tiene una actitud positiva hacia otros profesionales durante la activación |
| **30.** | Durante la activación del EUM está claro quién es el jefe del equipo |
| **31.** | Durante la activación del EUM el jefe del equipo asigna las tareas |
| **32.** | El jefe del equipo mantiene una reunión informativa con los profesionales implicados al finalizar la activación |
| **33.** | Durante la activación del EUM la comunicación es efectiva |
| **34.** | Durante la activación del EUM la falta de competencias técnicas o conocimientos es una barrera para su resolución |
| **35.** | Tengo pensamientos intrusivos acerca de un episodio de activación |
| **36.** | Anote aquí sus sugerencias para mejorar el funcionamiento del EUM |
| **37.** | **¿Ha activado personalmente el EUM?**  Sí ( pase a la pregunta 38)  No (fin del cuestionario)  No, pero podría haberlo activado ( pase a la pregunta 38) |
| *Sección 6. Elíjase la mejor opción para cada afirmación (1 – totalmente en desacuerdo; 2 – en desacuerdo; 3 – ni de acuerdo ni en desacuerdo; 4 – de acuerdo; 5 – totalmente de acuerdo):* | |
| **38.** | Me siento cómodo activando el UEM cuando me preocupa un paciente |
| **39.** | Me siento criticado por haber activado el UEM |
| **40.** | Necesito validación de otro profesional sanitario para activar el UEM |
| **41.** | Conozco mi papel antes y después de que llegue el UEM |
| **42.** | Siento que puedo hacer más cuando llega el UEM |
| **43.** | Mi cooperación con el UEM mejora mi capacidad de manejar a los pacientes graves |
| **44.** | Cuanto más conozco a un paciente, más fácil es activar el uem |
| **45.** | Siento que la excesiva carga de trabajo reduce mi capacidad de identificar con prontitud a los pacientes críticos |
| **46.** | Anote aquí sus sugerencias o comentarios acerca de su experiencia con el UEM |

**Tabla Suplementaria 3. Evaluación sobre el curso SVB**

| Pregunta | Respuestas totales  n=102 |
| --- | --- |
| Motivo de no haber obtenido la certificación SVB  Nunca he recibido una notificación para asistir  No sé  Soy instructor de SVB/SVA/SVI  He completado SVA/SVI en los últimos cinco años | 88 (86,3)  7 (6,9)  3 (2,9)  4 (3,9) |
| Años desde la certificación SVB | n=483  6±5 |
| ¿Considera útil el curso SVB?  Sí  No  No respondo / No puedo responder | n=483  475 (98,4)  2 (0,4)  6 (1,2) |
| ¿Considera útil el manual SVB?  Sí  No  No respondo / No puedo responder | n=483  435 (90,1)  14 (2,9)  34 (7,0) |
| ¿Considera útil la simulación SVB?  Yes  No  No respondo / No puedo responder | n=483  471 (97,5)  3 (0,6)  9 (1,9) |
| ¿Considera útil el taller de SUM?  Sí  No  No respondo / No puedo responder | n=483  440 (91,1)  4 (0,8)  39 (8,1) |

**Leyenda:** Los datos se expresan como media ± desviación estándar o número absoluto (porcentaje).

**Abreviaturas**: SVA - soporte vital avanzado, SVB - soporte vital básico, SVI - soporte vital inmediato, SUM –sistema de urgencias médicas.

**Tabla Suplementaria 4. Experiencia relativa a la activación del EUM, respuestas totales y clasificación por profesional con y sin SVB**

| **Afirmación** | **Totalmente en desacuerdo (1)**  **n(%)** | | | **En desacuerdo (2)**  **n(%)** | | | **Ni de acuerdo ni en desacuerdo (3) n(%)** | | | **De acuerdo (4)**  **n(%)** | | | **Totalmente de acuerdo (5)**  **n(%)** | | | **All** | | **SVBy** | | **SVBn** | | ***valor p*** |
| --- | --- | --- | --- | --- | --- | --- | --- | --- | --- | --- | --- | --- | --- | --- | --- | --- | --- | --- | --- | --- | --- | --- |
| **Total** | **SVBy** | **SVBn** | **Total** | **SVBy** | **SVBn** | **Total** | **SVBy** | **SVBn** | **Total** | **SVBy** | **SVBn** | **Total** | **SVBy** | **SVBn** | **X̅** | **Q1,Q3** | **X̅** | **Q1,Q3** | **X̅** | **Q1,Q3** |
| 38. Me siento cómodo activando el UEM cuando me preocupa un paciente n=288/263/25 | 1  (0,3) | 1  (0,4) | 0  (0,0) | 4  (1,4) | 3  (1,1) | 1  (4,0) | 22  (7,6) | 19  (7,2) | 3  (12,0) | 71  (24,7) | 68  (25,9) | 3  (12,0) | 190  (66,0) | 172  (65,4) | 18  (72,0) | 5 | 4,5 | 5 | 4,5 | 5 | 4,5 | 0.74 |
| 39. Me siento criticado por haber activado el UEM n=287/262/25***1** | 170  (59,2) | 154  (58,8) | 16  (64,0) | 46  (16,0) | 45  (17,2) | 1  (4,0) | 19  (6,6) | 15  (5,7) | 4  (16,0) | 43  (15,0) | 42  (16,0) | 1  (4,0) | 9  (3,1) | 6  (2,3) | 3  (12,0) | 1 | 1,2 | 1 | 1,2 | 1 | 1,3 | 0.94 |
| 40. Necesito validación de otro profesional sanitario para activar el UEM n=285/260/25***2** | 167  (58,6) | 154  (59,2) | 13  (52,0) | 50  (17,5) | 48  (18,5) | 2  (8,0) | 30  (10,5) | 26  (10,0) | 4  (16,0) | 28  (9,8) | 27  (10,4) | 1  (4,0) | 10  (3,5) | 5  (1,9) | 5  (20,0) | 1 | 1,2 | 1 | 1,2 | 1 | 1,4 | 0.16 |
| 44. Cuanto más conozco a un paciente, más fácil es activar el uem n=280/257/23***3** | 18  (6,4) | 16  (6,2) | 2  (8,7) | 6  (2,1) | 3  (1,2) | 3  (13,0) | 30  (10,7) | 27  (10,5) | 3  (13,0) | 44  (15,7) | 42  (16,3) | 2  (8,7) | 182  (65,0) | 169  (65,8) | 13  (56,5) | 5 | 4,5 | 5 | 4,5 | 5 | 3,5 | 0.19 |
| 45. Siento que la excesiva carga de trabajo reduce mi capacidad de identificar con prontitud a los pacientes críticos n=278/256/22 | 39  (14,0) | 33  (12,9) | 6  (27,3) | 40  (14,4) | 36  (14,1) | 4  (18,2) | 72  (25,9) | 67  (26,2) | 5  (22,7) | 61  (21,9) | 57  (22,3) | 4  (18,2) | 66  (23,7) | 63  (24,6) | 3  (13,6) | 3 | 2,4 | 3 | 2,4 | 3 | 1,4 | 0.06 |

**Leyenda:** En las columnas izquierdas los datos se expresan como frecuencia absoluta (porcentaje), y en las columnas derechas como mediana (X̅**)**, cuartil 1 (Q1) y cuartil 3 (Q3).

En la columna izquierda: ***1*p*=0,004 *2*p*<0,001, *3*p*=0,004**

**Abreviaturas:** SVBy – profesionales con SVB, SVBn - profesionales sin SVB, EUM - equipo de urgencias médicas
